# Supplementary material for: Nanotube ferroelectric tunnel junctions with an ultrahigh tunneling electroresistance ratio
Source: Royal Society of Chemistry journal article supplement (doi:10.1039/d3mh02006a), 2024-01-01
Supplement: d3mh02006a1.pdf [file d3mh02006a1.pdf]

# Supplementary information for Nanotube ferroelectric tunnel junctions with giant tunneling electroresistance ratio

Jiu-Long Wang, Yi-Feng Zhao, Wen Xu, Jun-Ding Zheng, Ya-Ping Shao,  
Wen-Yi Tong\*, Chun-Gang Duan\*

## AUTHOR INFORMATION

### Corresponding Author

**Wen-Yi Tong** - Key Laboratory of Polar Materials and Devices (MOE), Ministry of Education, Department of Electronics, East China Normal University, Shanghai, 200241, China  
Shanghai Center of Brain-inspired Intelligent Materials and Devices, East China Normal University, Shanghai 200241, China

E-mail: [wytong@ee.ecnu.edu.cn](mailto:wytong@ee.ecnu.edu.cn)

**Chun-Gang Duan** - Key Laboratory of Polar Materials and Devices (MOE), Ministry of Education, Department of Electronics, East China Normal University, Shanghai, 200241, China  
Shanghai Center of Brain-inspired Intelligent Materials and Devices, East China Normal University, Shanghai 200241, China

E-mail: [cgduan@clpm.ecnu.edu.cn](mailto:cgduan@clpm.ecnu.edu.cn)

### Authors

**Jiu-Long Wang** - Key Laboratory of Polar Materials and Devices (MOE), Ministry of Education, Department of Electronics, East China Normal University, Shanghai, 200241, China  
Shanghai Center of Brain-inspired Intelligent Materials and Devices, East China Normal University, Shanghai 200241, China

**Yi-Feng Zhao** - Key Laboratory of Polar Materials and Devices (MOE), Ministry of Education, Department of Electronics, East China Normal University, Shanghai, 200241, China  
Shanghai Center of Brain-inspired Intelligent Materials and Devices, East China Normal University, Shanghai 200241, China

**Wen Xu** - Key Laboratory of Polar Materials and Devices (MOE), Ministry of Education,  
Department of Electronics, East China Normal University, Shanghai, 200241, China  
Shanghai Center of Brain-inspired Intelligent Materials and Devices, East China Normal  
University, Shanghai 200241, China

**Jun-Ding Zheng** - Key Laboratory of Polar Materials and Devices (MOE), Ministry of  
Education, Department of Electronics, East China Normal University, Shanghai, 200241, China  
Shanghai Center of Brain-inspired Intelligent Materials and Devices, East China Normal  
University, Shanghai 200241, China

**Ya-Ping Shao** - Key Laboratory of Polar Materials and Devices (MOE), Ministry of Education,  
Department of Electronics, East China Normal University, Shanghai, 200241, China  
Shanghai Center of Brain-inspired Intelligent Materials and Devices, East China Normal  
University, Shanghai 200241, China

## Band Structure of 30ZN

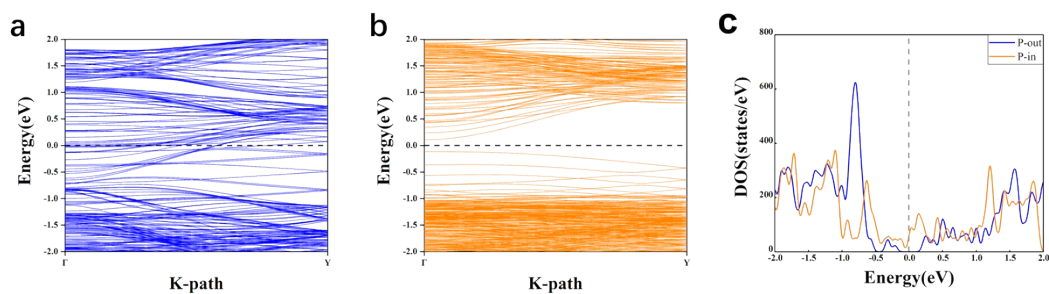

**Figure S1.** (a-b) The band structures of P-out and P-in 30ZN. (c) The density of state (DOS) of monolayer  $\text{In}_2\text{Se}_3$  P-out and P-in ZN using LDA pseudopotentials.

We calculated the band structure of 30ZN. It is obviously that when the polarization is outward, band gap would close; while it opens a band gap of 0.22eV when the polarization turns inward. And the DOS of LDA also tell us the robust metal-insulator phase transition.

## Properties of other $\text{In}_2\text{Se}_3$ nanotubes

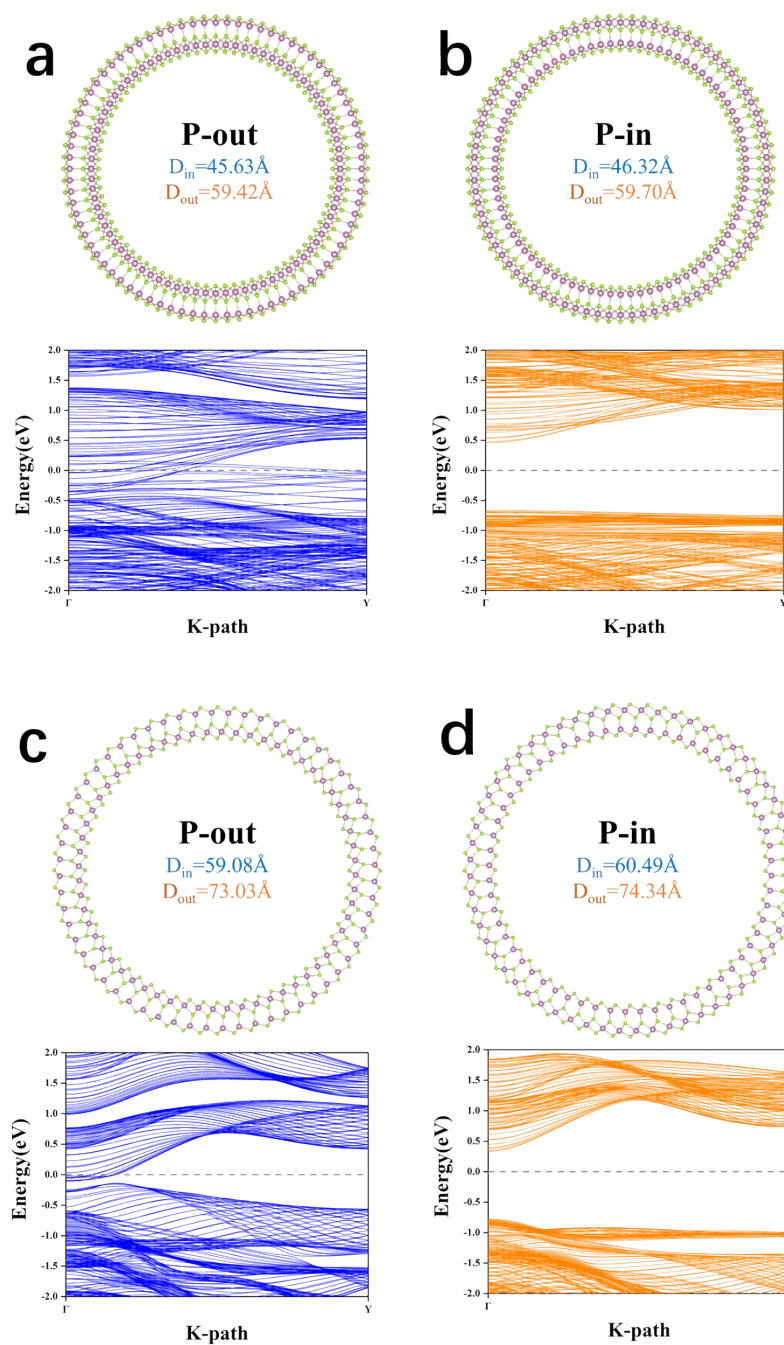

**Figure S2.** Schematic diagram and band structure of (a-b) P-out and P-in 40ZN, (c-d) P-out and P-in armchair nanotube with 30 units (30AN).

The structure of 40ZN and 30AN are revealed in Fig.S2(a-d), it can be seen  $D_{\text{in}}$  and  $D_{\text{out}}$  increase with the reversal of the polarization from outward to inward. P-in 40ZN opens a band gap of 1.10eV, and the band gap in P-in 30AN is 1.12eV. The P-out states, as expected, always maintain metallic. These results indicate that the metal-insulator

transition seems to be a robust feature in both zigzag and armchair  $\text{In}_2\text{Se}_3$  nanotubes within reasonable diameters.

## Transportation along radial direction

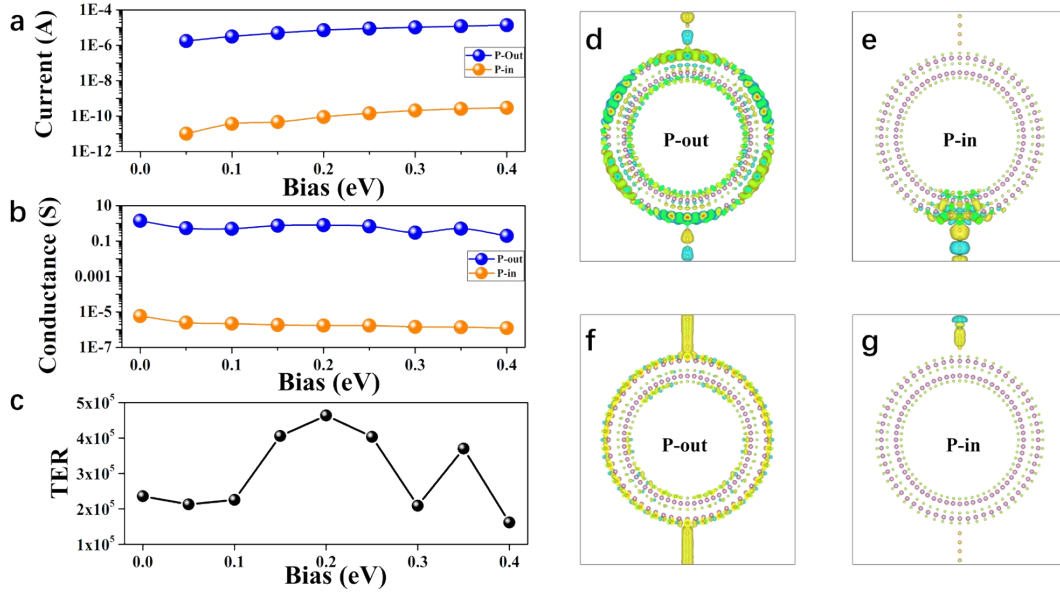

**Figure S3.** (a) I-V characteristic curve. (b) the conductance and (c) tunneling resistance ratio of In<sub>2</sub>Se<sub>3</sub> ZN under bias. (d,e) The transport channel and (f,g) current in real space of P-out and P-in ZN with Au chain as lead under 0.15eV bias.

Without bias as shown in Fig.S4(b), the conductance of P-out 30ZN is  $G_{\text{out}} = 1.40 S$ ; by the contrast,  $G_{\text{in}} = 5.93 \times 10^{-6} S$  of P-in state is negligible. Order of magnitudes difference between two polarization states exhibits in the I-V curve of Fig.S4(a) as well. We then choose ZN under 0.15 eV bias, as example, to graphically show the change of transport channel and current in real space between P-in and P-out states. The consistency of current and transport channel confirms the metallicity in P-out nanotube (see Fig.S4(d,f)). Due to its insulating property, the P-in nanotube shows neither transport nor current channel in Fig.S4(e,g).

## DOS of different units in nanotube

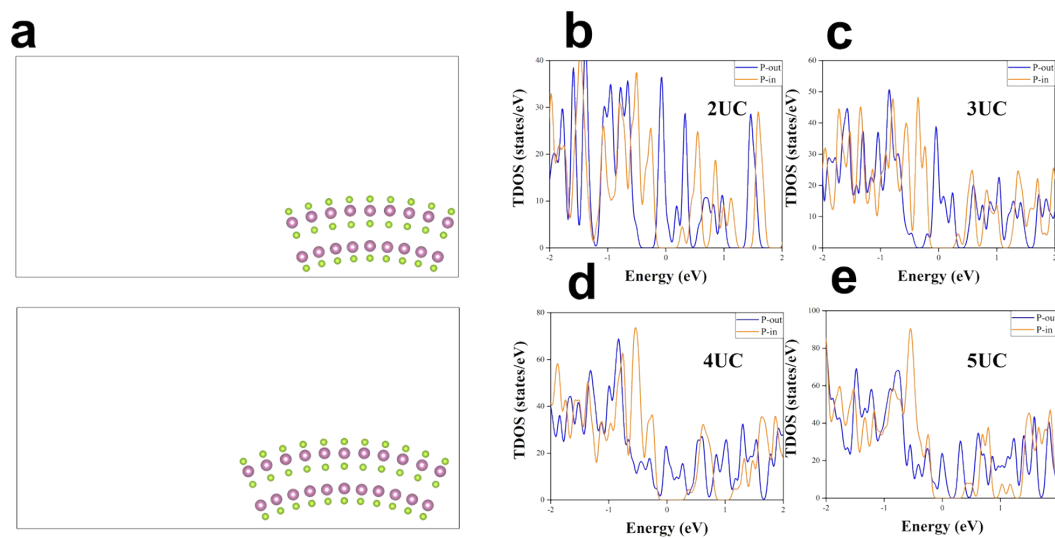

**Figure S4.** (a) Schematic diagram of four and five unit cells (UC) in P-in 30ZN. Vacuum are perpendicular to transport direction. (b-e) DOS of different unit cells in 30ZN.

The metal-insulator transition of  $\alpha$ - $\text{In}_2\text{Se}_3$  nanotubes is robust, regardless of the number of unit cells taken into account. Moreover, the band gap of unit cells in P-in 30ZN is approximately 0.5eV. Thus, we anticipate that the ultrahigh TER ratio is an intrinsic property of ferroelectric  $\text{In}_2\text{Se}_3$  nanotubes

## DOS of nanotube FTJ

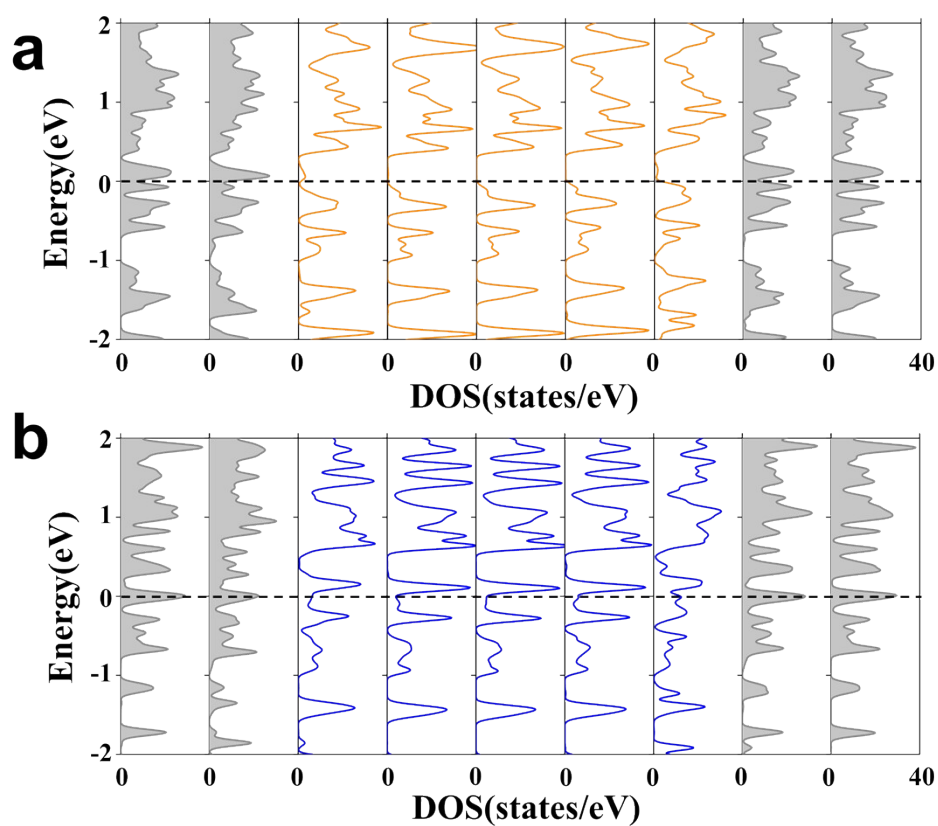

**Figure S5.** The layer-resolved projected density of states (PDOS) of the central region of the nanotube FTJ for (a) the P-in state, (b) the P-out state.

To study the origin of the giant TER ratio, we analyze the layer-resolved projected density of states of axial transport model, as shown in Fig.S5. In the P-out case, each layer is metallic and no gap is found around the Fermi level. In contrast, in the P-in case, there is a large band gap above the Fermi level and the Fermi level just cuts the tail of the valence band of In<sub>2</sub>Se<sub>3</sub>.



## Some other figures

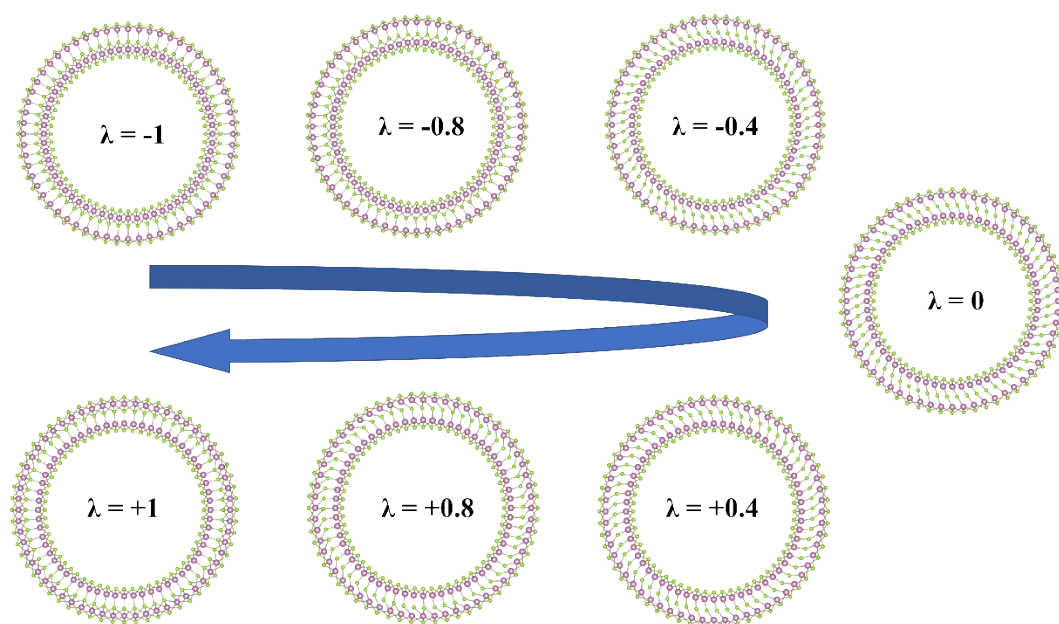

**Figure. S6.** Top are the structures of  $\text{fcc}' \text{In}_2\text{Se}_3$  ( $\beta\text{-In}_2\text{Se}_3$ ) nanotube, bottom are the structures of  $\text{FE-ZB}' \text{In}_2\text{Se}_3$  ( $\alpha\text{-In}_2\text{Se}_3$ ) nanotube. From left to right are the structure of  $\text{In}_2\text{Se}_3$  unit cell, top view and side view of  $\text{In}_2\text{Se}_3$  nanotube

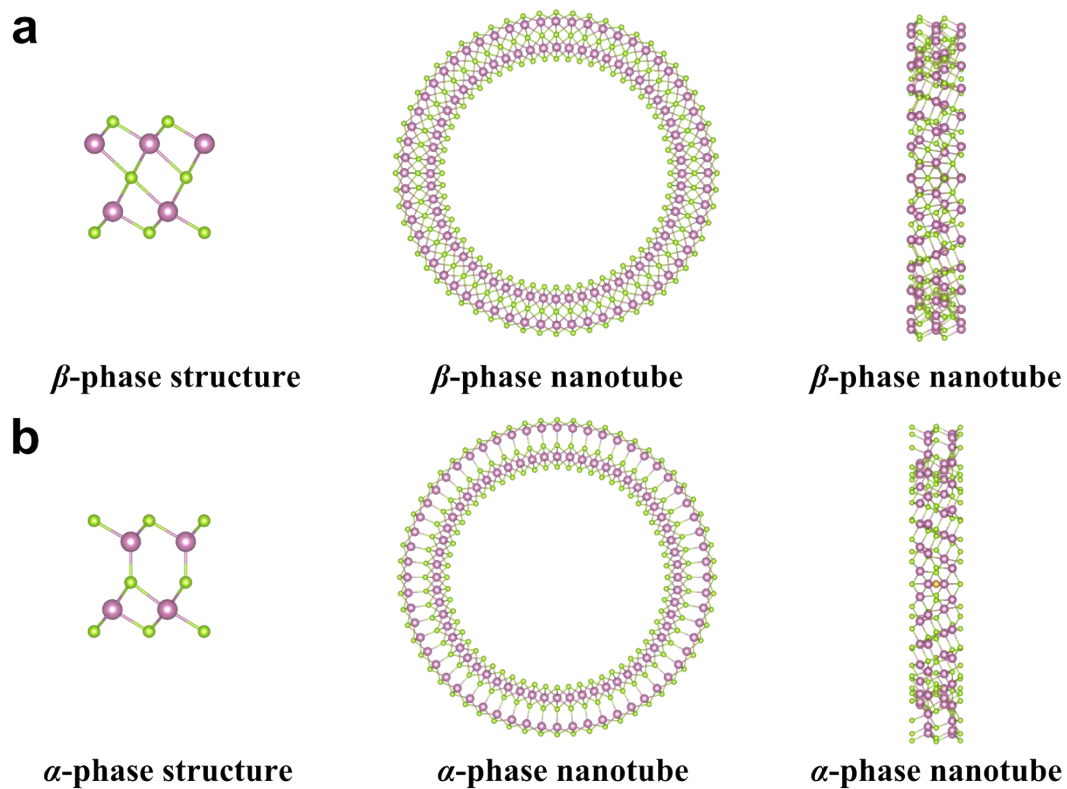

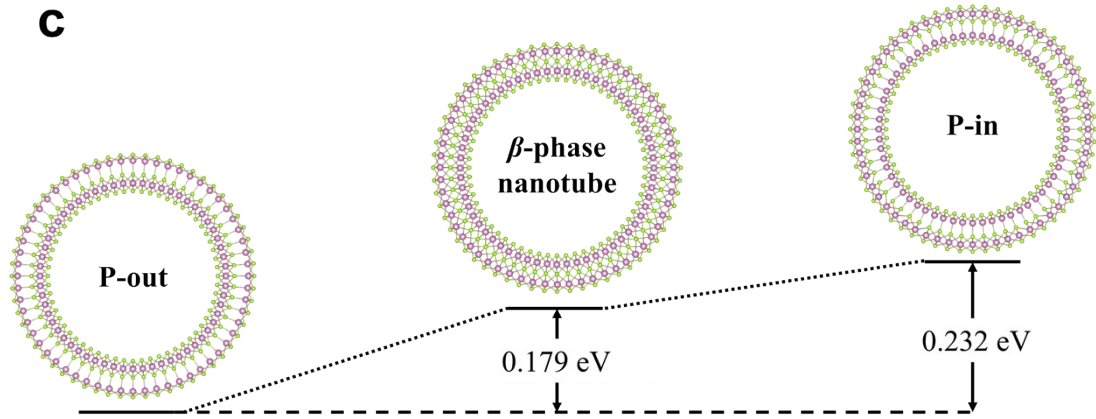

**Figure. S7.** The comparison of  $\beta$ - $\text{In}_2\text{Se}_3$  nanotube and  $\alpha$ - $\text{In}_2\text{Se}_3$  nanotube. (a) The structures of  $\beta$ - $\text{In}_2\text{Se}_3$  nanotube. (b) The structures of  $\alpha$ - $\text{In}_2\text{Se}_3$  nanotube. From left to right are the structure of  $\text{In}_2\text{Se}_3$  unit cell, top view and side view of  $\text{In}_2\text{Se}_3$  nanotube. (c) Kinetics pathways of polarization reversal processes with  $\beta$ - $\text{In}_2\text{Se}_3$  nanotube as transition states.

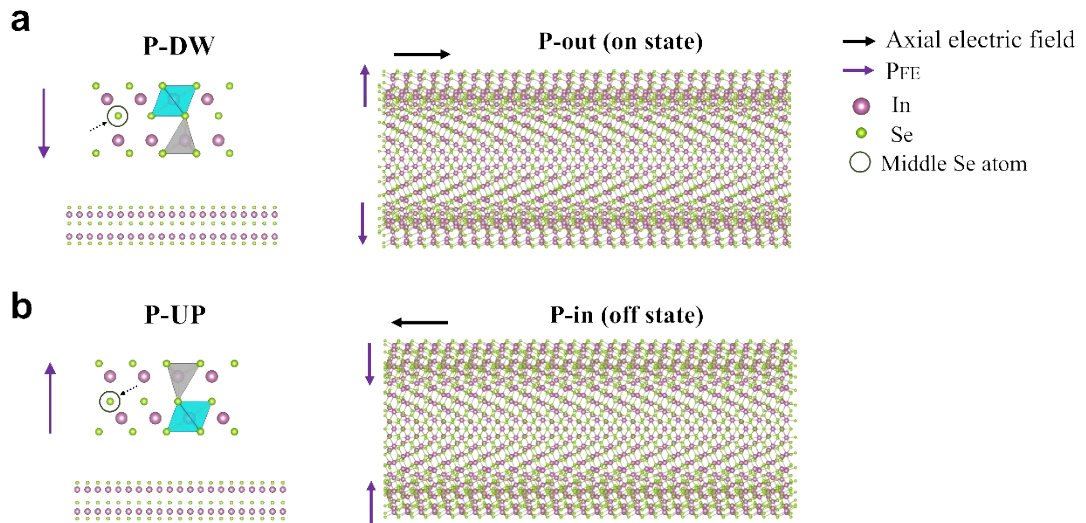

**Figure. S8.** (a-b) Schematic diagram of P-DW/P-UP monolayer  $\alpha$ - $\text{In}_2\text{Se}_3$  and P-out/P-in  $\alpha$ - $\text{In}_2\text{Se}_3$  nanotube, the black arrows represent the axial electric fields, which can move the middle Se from left to right/right to left, and reverse the out-of-plane polarization in monolayer (radial polarization in nanotube).
